# Supplementary material for: Scanning Electron Microscopy and Energy Dispersive Spectroscopy Reveal Amorphous Apatitic Cores in Ductal plugs bearing Calcium Oxalate Stone Overgrowths
Source: Research Square preprint supplement (doi:10.21203/rs.3.rs-6596012/v1), 2025-06-17
Supplement: Supplementary file 1 [file fd687afbfe0dc4f896b85913.pdf]

**Supplemental Table 1****Clinical and surgical data on patients with ductal plug stones**

|                                    | <b>Patient 1</b> | <b>Patient 2</b> | <b>Patient 3</b> | <b>Patient 4</b> |
|------------------------------------|------------------|------------------|------------------|------------------|
| # Ductal plug stones               | 4                | 2                | 2                | 4                |
| Age                                | 41               | 38               | 44               | 55               |
| Sex                                | F                | F                | F                | F                |
| Body mass index                    | 29.8             | 19.63            | 35.82            | 32               |
| Age at first stone                 | 17               | 32               | 39               | —                |
| Hypertension                       | No               | No               | No               | —                |
| Diabetes                           | No               | No               | No               | —                |
| Surgery                            | URS              | URS              | Perc             | URS              |
| Serum creatinine (mg/dL)           | 0.48             | 0.98             | 0.73             | 1.04             |
| Serum calcium (mg/dL)              | 10.3             | 9.2              | 10.1             | 10.1             |
| Serum uric acid (mg/dL)            | 3.2              | —                | 6.5              | —                |
| 24-hour urine volume (L)           | —                | 3.5              | 1.45             | 1.6              |
| 24-hour urine pH                   | —                | 6.63             | 5.9              | 5.9              |
| 24-hour urine citrate (mg)         | —                | 736              | 480              | 23               |
| 24-hour urine calcium (mg)         | —                | 262              | 360              | 219              |
| 24-hour urine oxalate (mg)         | —                | 25               | 35               | 25               |
| 24-hour urine sodium (mEq)         | —                | 77               | 184              | 101              |
| 24-hour urine CaOx supersaturation | —                | 3.01             | 13.16            | 9.4              |
| 24-hour urine CaP supersaturation  | —                | 1.32             | 1.65             | 0.6              |

URS, ureteroscopy. Perc, percutaneous nephrolithotomy, or Both, both ureteroscopy and percutaneous nephrolithotomy.

317     **Supplemental Table 2**

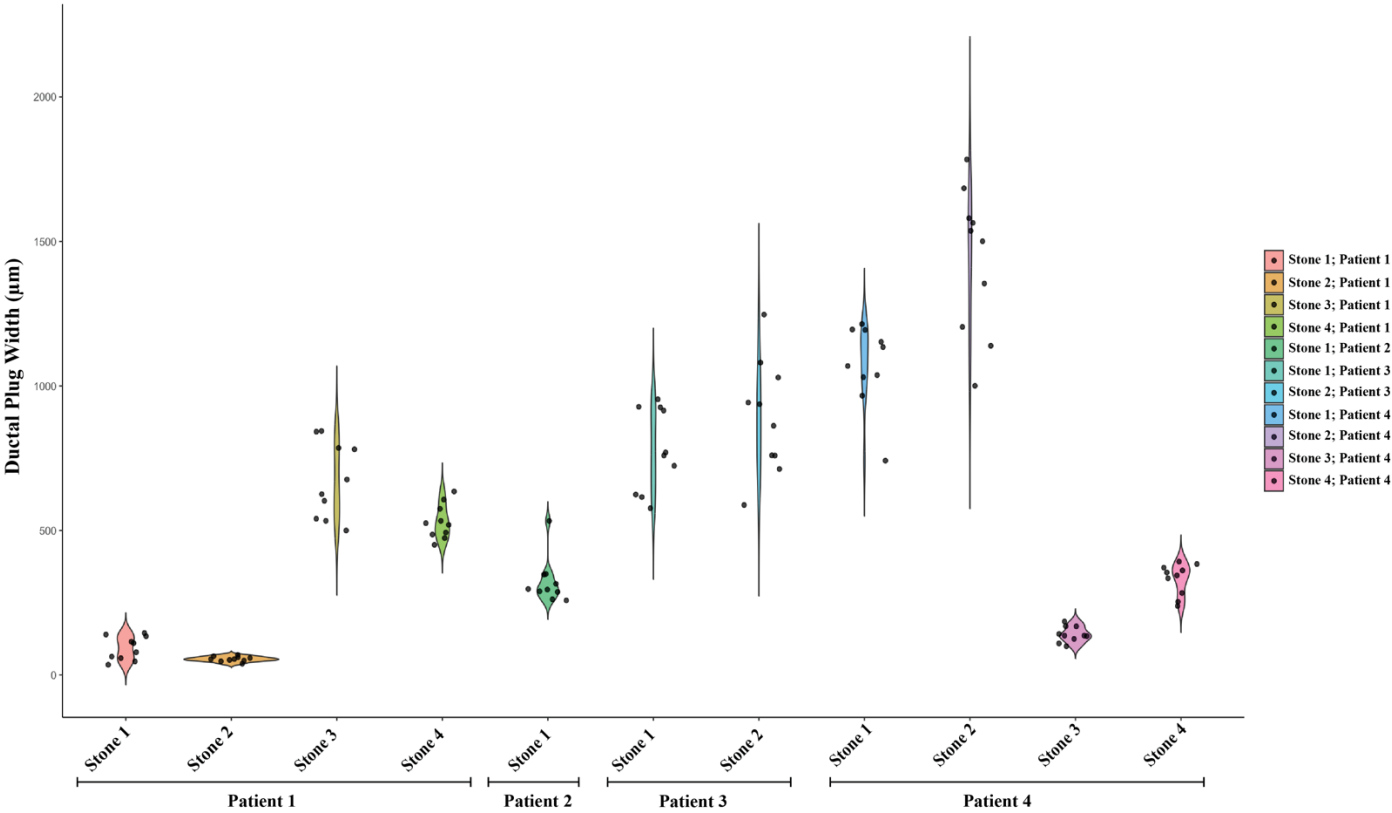

318

319     **Supplemental Table 2. Ductal plug width measurements (µm) from micro CT analysis.**

320     Individual ductal plug width measurements (µm) obtained from micro CT virtual slice analysis.

321

Supplemental Figure S1

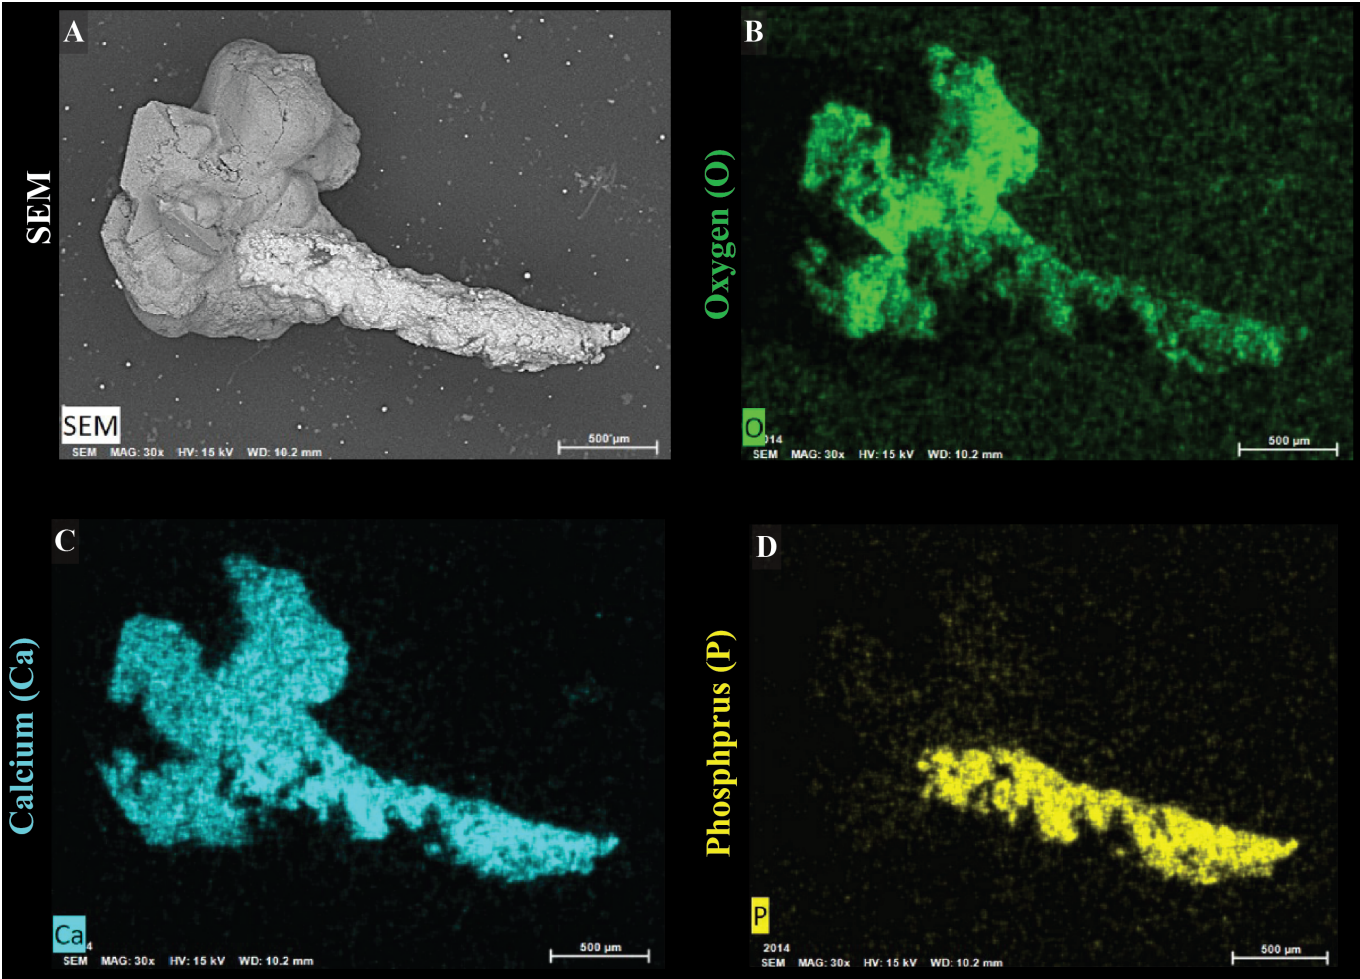

**Supplemental Figure S1. Energy dispersive spectroscopy (EDS) analysis of ductal stone #4 from Patient 4 (referenced in main Figure 1) confirms the presence of calcium phosphate (CaP) apatite crystals in the plug portion. (A) SEM image highlighting the analyzed ductal plug stone from Patient 4, stone #4. (B) Distribution of oxygen (O) atoms throughout the stone and plug. (C) Detection of calcium (Ca) atoms across throughout the stone, including in the overgrowth areas of calcium oxalate monohydrate (COM) and calcium oxalate dihydrate (COD). (D) A long region positive for both calcium (Ca) and phosphorus (P) atoms, indicating the presence of CaP apatite crystals within the plug region.**

## Supplementary Figure S2

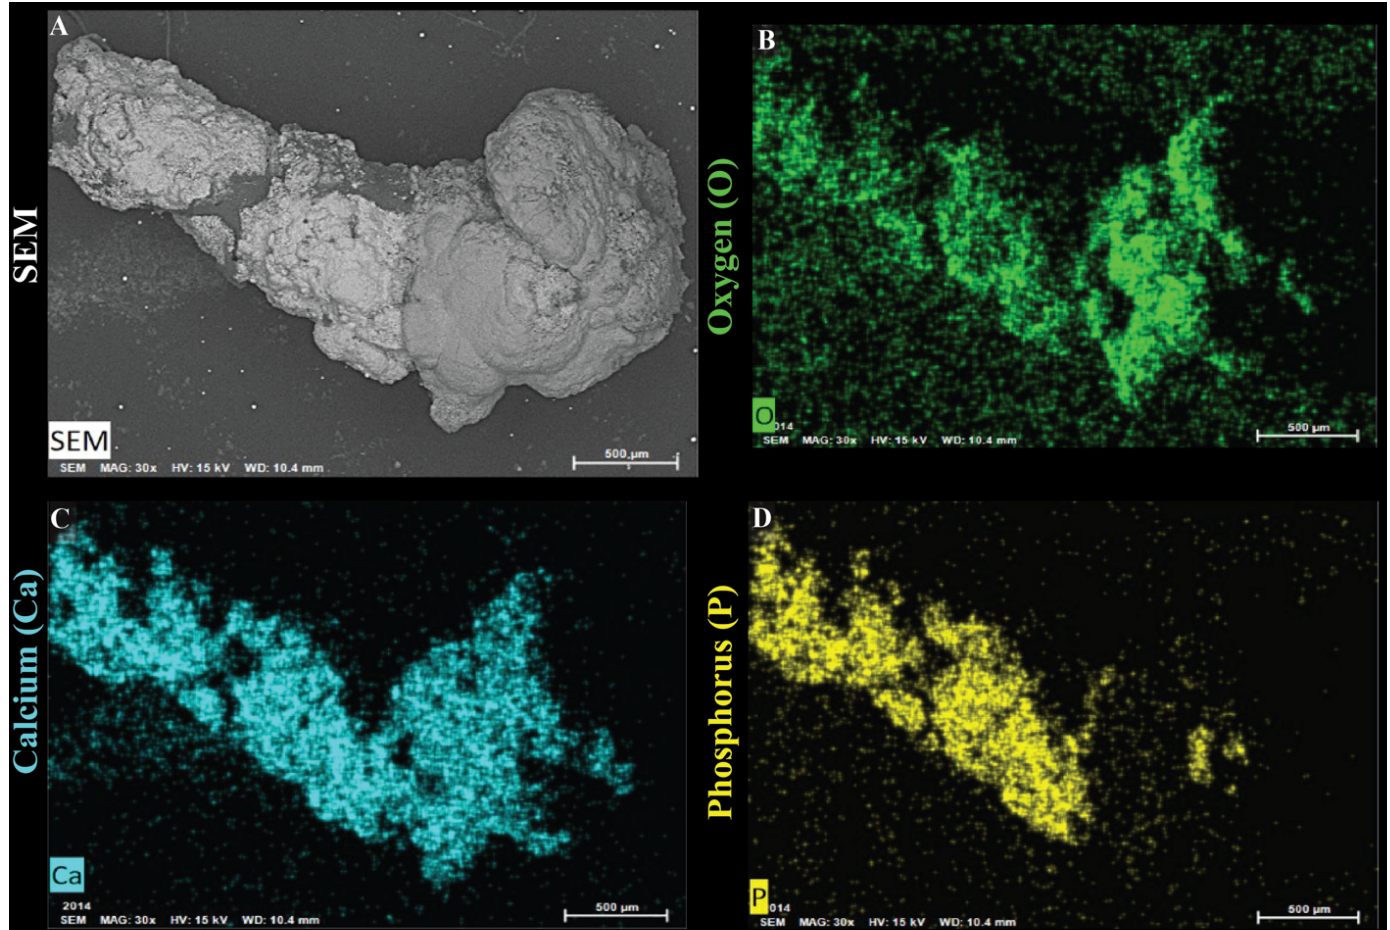

**Supplementary Figure S2. Energy dispersive spectroscopy (EDS) analysis of ductal stone #1 from Patient 3 (referenced in main Figures 2 and 3) confirms the presence of calcium phosphate (CaP) apatite crystals in the plug portion. (A) SEM image highlighting the analyzed ductal plug stone from Patient 3, stone #1. (B) Distribution of oxygen (O) atoms throughout the stone and plug. (C) Detection of calcium (Ca) atoms across throughout the stone, including in the overgrowth areas of calcium oxalate monohydrate (COM) and calcium oxalate dihydrate (COD). A shadow casts blocks some of the COM due to sample positioning. (D) A long region positive for both calcium (Ca) and phosphorus (P) atoms, indicating the presence of CaP apatite crystals within the plug region.**



Supplementary Figure S3

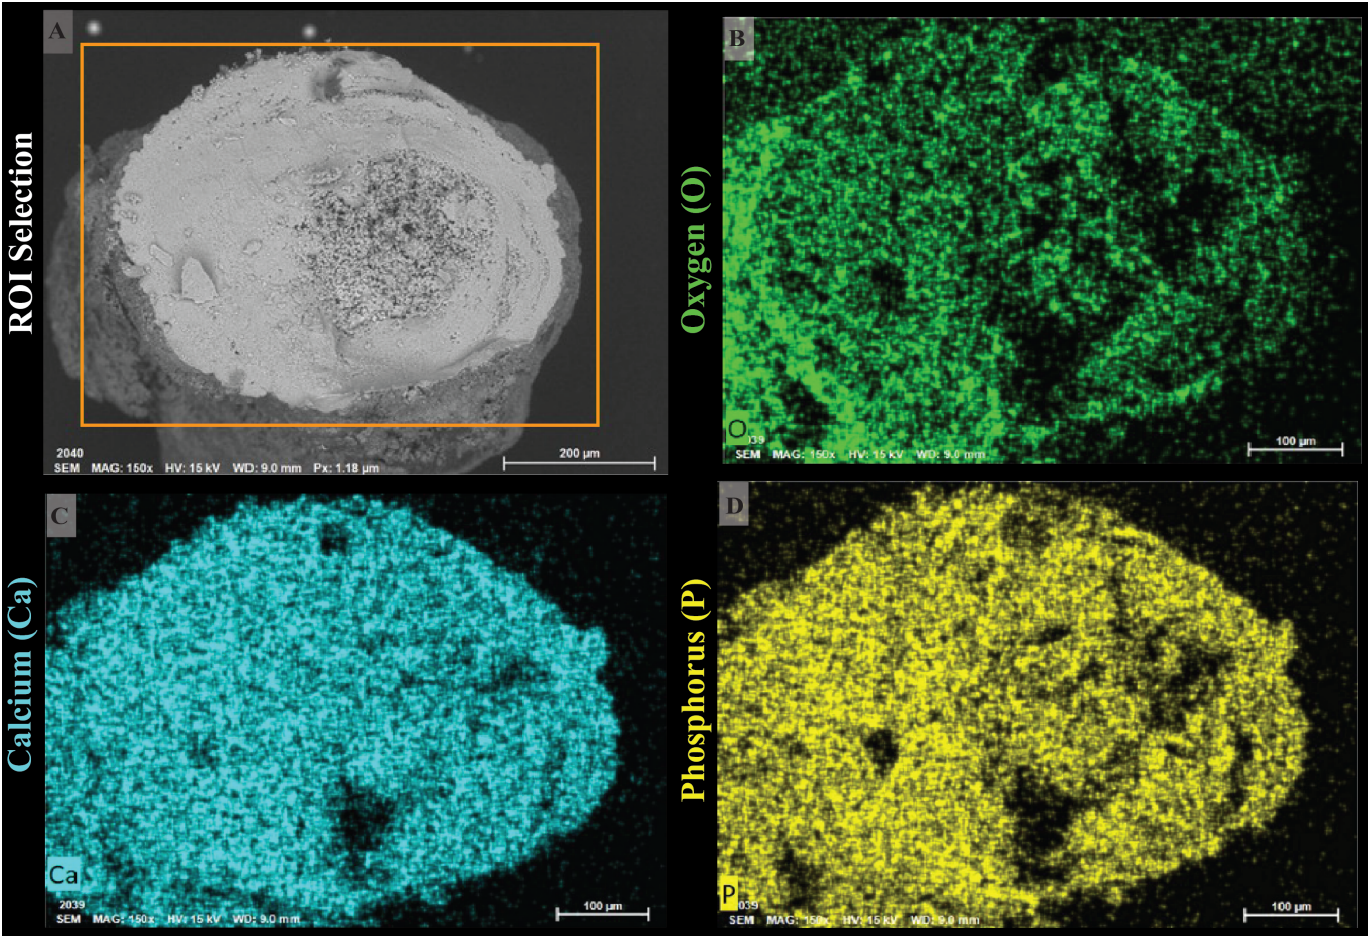

**Supplementary Figure S3. EDS analysis.** Energy dispersive spectroscopy (EDS) analysis of ductal stone #1 from Patient 4 (referenced in main Figure 4) confirms the presence of calcium phosphate (CaP) apatite crystals in the sectioned plug portion. (A) SEM image highlighting the analyzed ductal plug stone from Patient 4, stone #1. (B) Distribution of oxygen (O) atoms throughout the stone and plug. (C) Detection of calcium (Ca) atoms throughout the plug. (D) Detection of phosphorus (P) atoms, indicating the presence of CaP apatite crystals within the plug region.

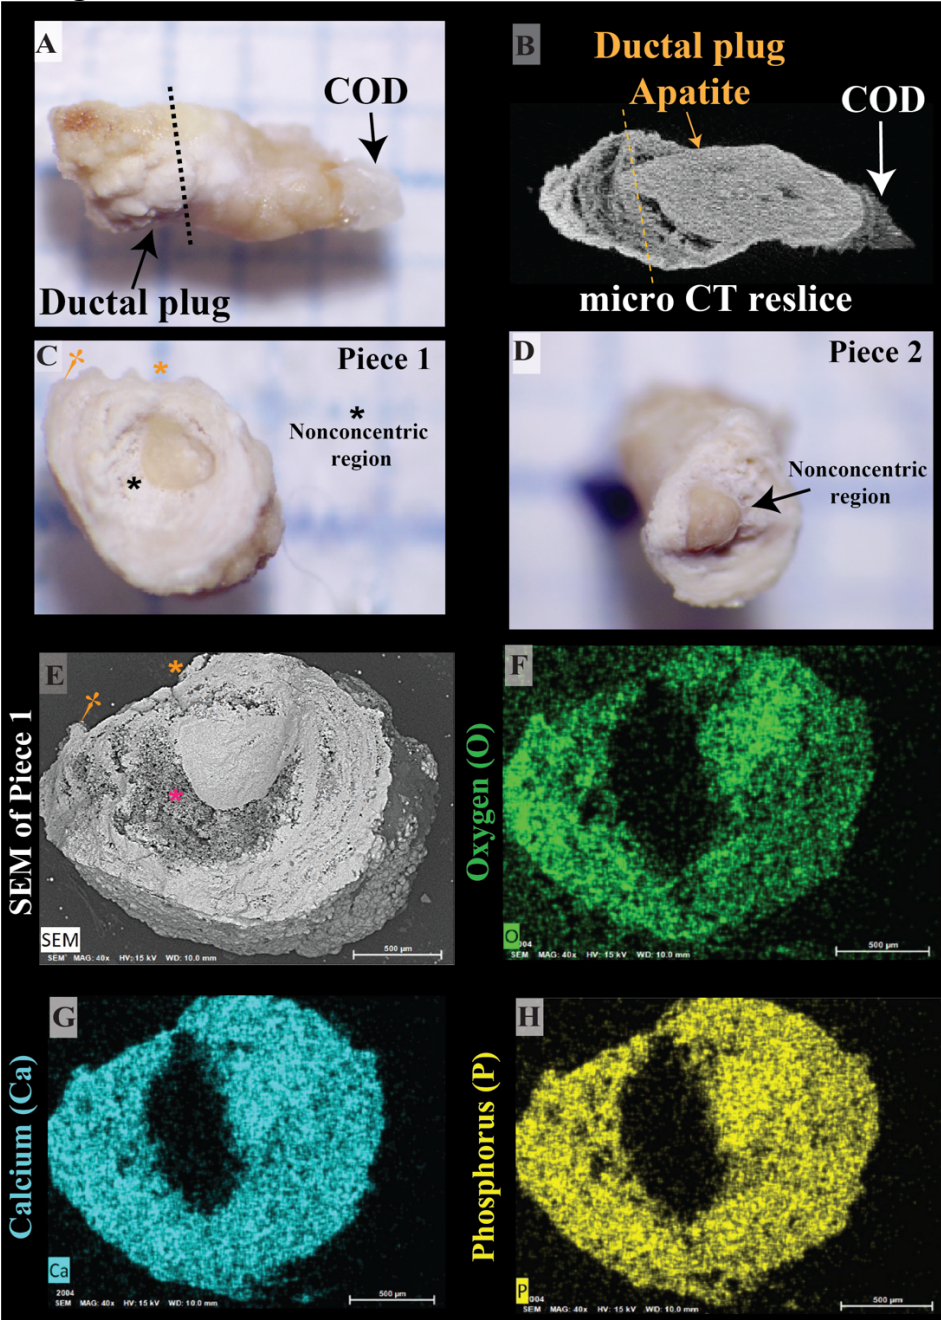

**Supplemental Figure S4. Sectioning of the ductal plug stone shown in main Figure 5.** Scanning electron microscopy (SEM) and Energy dispersive spectroscopy (EDS) analysis of piece 1 from ductal stone #2 from Patient 4 confirms the presence of calcium phosphate (CaP) apatite crystals in the sectioned plug portion.



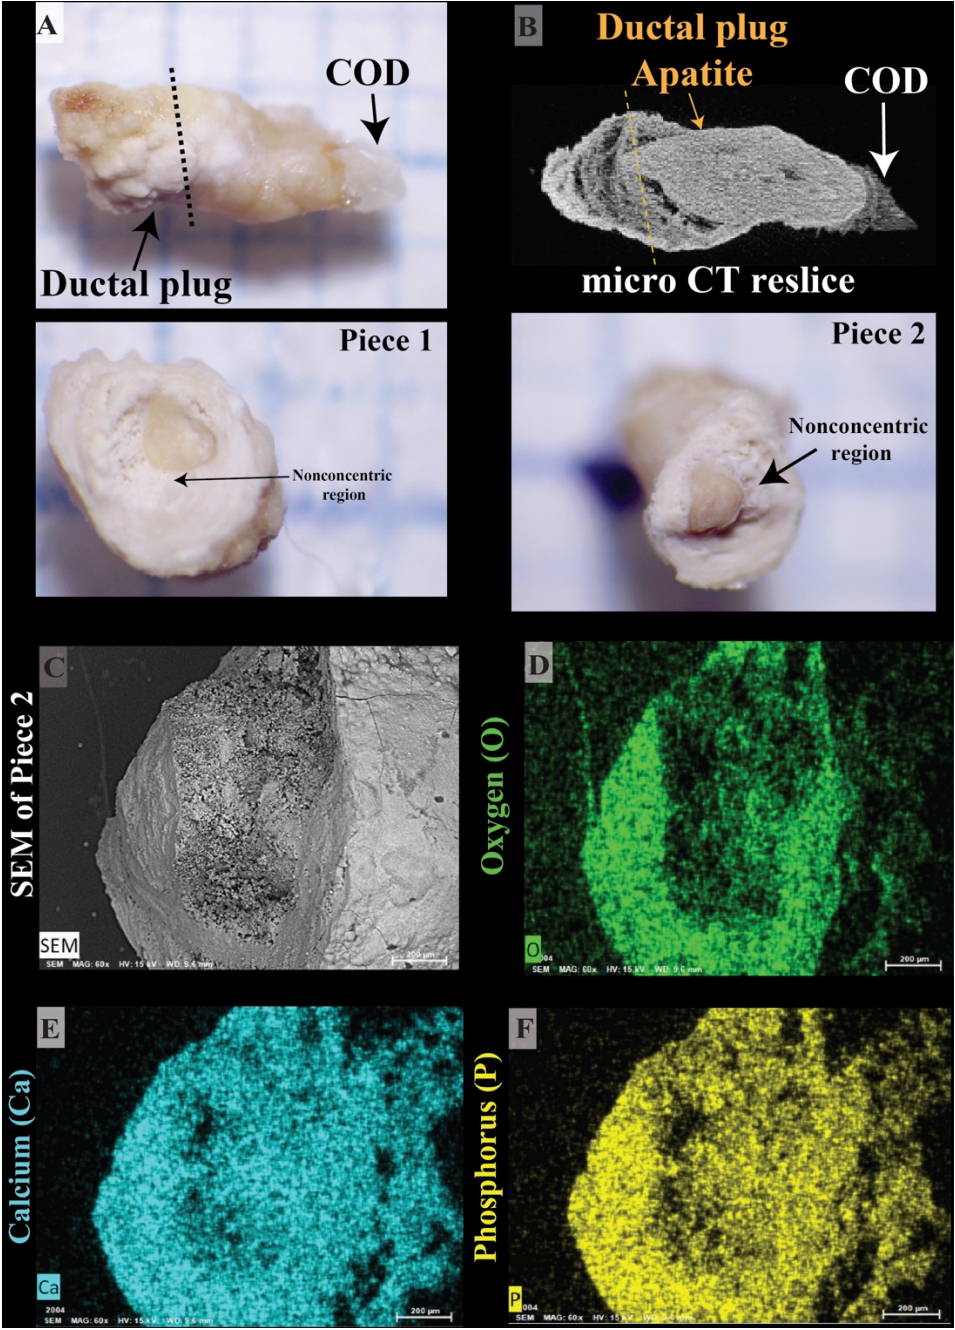

**Supplemental Figure S5. Sectioning of the ductal plug stone shown in main Figure 5.**

Scanning electron microscopy (SEM) and Energy dispersive spectroscopy (EDS) analysis of piece 2 from ductal stone #2 from Patient 4 confirms the presence of calcium phosphate (CaP) apatite crystals in the sectioned plug portion.
